# Supplementary material for: Towards Machine Learning in Heterogeneous Catalysis—A Case Study of 2,4-Dinitrotoluene Hydrogenation
Source: MDPI journal article supplement (doi:10.3390/ijms241411461), 2023-07-14
Supplement: s1 [file s1]

Supplementary Information

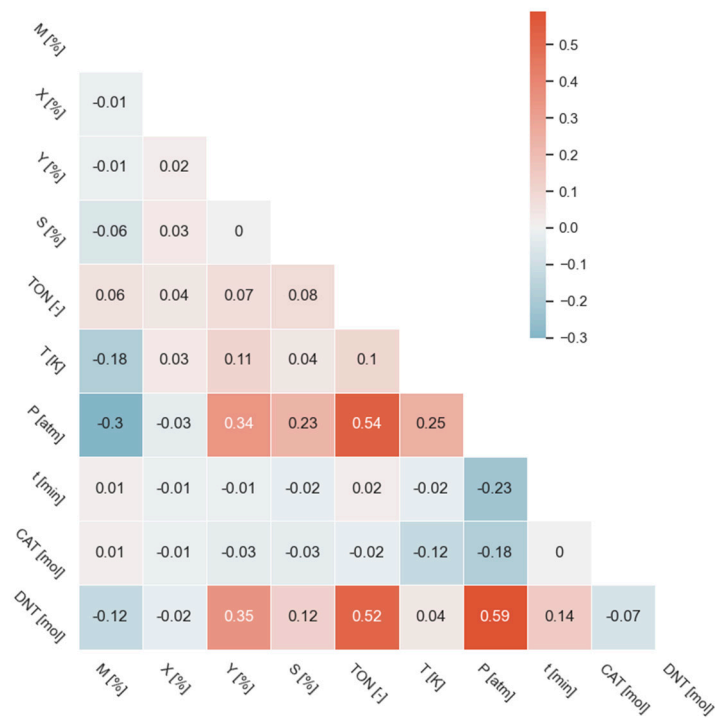

S1. Filtered dataset of statistical analysis according to MIRA21

Dataset of statistical analysis according to MIRA21<sup>35–49</sup>

| MAIN_A_COMP | No.A_COMP | A_METALCONT | CARRIER | Solvent  | MAXCONV | PRYIELD | PRSEL | TON  | TEMP | PRESS | TIME | nCAT     | nDNT  |
|-------------|-----------|-------------|---------|----------|---------|---------|-------|------|------|-------|------|----------|-------|
|             |           | w/w%        |         |          | %       | %       | %     | -    | K    | atm   | min  | mol      | mol   |
| Platinum    | 1         | 5.0         | TMO     | methanol | 100     | 62      | 62    | 181  | 333  | 20    | 60   | 2.56E-05 | 0.008 |
| Palladium   | 1         | 5.0         | TMO     | methanol | 100     | 83      | 83    | 132  | 333  | 20    | 60   | 4.70E-05 | 0.008 |
| Palladium   | 2         | 4.5         | TMO     | methanol | 100     | 87      | 87    | 145  | 333  | 20    | 30   | 4.49E-05 | 0.008 |
| Palladium   | 1         | 4.5         | TMO     | methanol | 100     | 100     | 100   | 176  | 333  | 20    | 80   | 4.25E-05 | 0.008 |
| Platinum    | 1         | 3.0         | TMO     | methanol | 100     | 99      | 99    | 479  | 323  | 20    | 40   | 1.55E-05 | 0.008 |
| Platinum    | 1         | 0.2         | TMO     | ethanol  | 100     | 97      | 97    | 6661 | 353  | 10    | 29   | 1.60E-06 | 0.011 |
| Platinum    | 1         | 0.2         | TMO     | ethanol  | 100     | 99      | 99    | 6784 | 353  | 10    | 21   | 1.60E-06 | 0.011 |
| Platinum    | 1         | 0.2         | TMO     | ethanol  | 100     | 98      | 98    | 6740 | 353  | 10    | 24   | 1.60E-06 | 0.011 |
| Platinum    | 1         | 0.4         | TMO     | ethanol  | 100     | 98      | 98    | 2389 | 353  | 10    | 13   | 4.52E-06 | 0.011 |
| Platinum    | 1         | 0.5         | TMO     | ethanol  | 100     | 98      | 98    | 2082 | 353  | 10    | 12   | 5.19E-06 | 0.011 |
| Platinum    | 1         | 0.5         | TMO     | ethanol  | 100     | 98      | 98    | 2004 | 353  | 10    | 12   | 5.35E-06 | 0.011 |
| Palladium   | 1         | 0.5         | Carbon  | ethanol  | 100     | 83      | 83    | 445  | 323  | 1     | 19   | 4.68E-06 | 0.003 |

|           |   |      |         |          |     |     |     |      |     |    |     |          |       |
|-----------|---|------|---------|----------|-----|-----|-----|------|-----|----|-----|----------|-------|
| Palladium | 1 | 1.0  | Carbon  | ethanol  | 100 | 82  | 82  | 196  | 323 | 1  | 20  | 1.05E-05 | 0.003 |
| Palladium | 1 | 1.0  | Carbon  | ethanol  | 100 | 93  | 93  | 210  | 323 | 1  | 12  | 1.11E-05 | 0.003 |
| Palladium | 1 | 1.0  | Carbon  | ethanol  | 100 | 87  | 87  | 235  | 323 | 1  | 7   | 9.29E-06 | 0.003 |
| Palladium | 1 | 1.0  | Carbon  | ethanol  | 100 | 84  | 84  | 232  | 323 | 1  | 98  | 9.04E-06 | 0.003 |
| Palladium | 1 | 3.0  | Carbon  | ethanol  | 100 | 82  | 82  | 84   | 323 | 1  | 71  | 2.44E-05 | 0.003 |
| Palladium | 1 | 5.0  | Carbon  | ethanol  | 100 | 93  | 93  | 100  | 323 | 1  | 52  | 2.32E-05 | 0.003 |
| Palladium | 1 | 5.0  | Carbon  | ethanol  | 100 | 97  | 97  | 119  | 323 | 1  | 87  | 2.04E-05 | 0.003 |
| Palladium | 1 | 3.8  | TMO     | methanol | 100 | 100 | 100 | 111  | 333 | 20 | 40  | 3.82E-05 | 0.010 |
| Palladium | 1 | 4.0  | TMO     | methanol | 100 | 84  | 84  | 91   | 333 | 20 | 40  | 3.98E-05 | 0.010 |
| Palladium | 1 | 4.3  | TMO     | methanol | 100 | 54  | 54  | 27   | 333 | 20 | 120 | 4.08E-05 | 0.010 |
| Iridium   | 3 | 5.0  | Carbon  | methanol | 100 | 99  | 99  | 6950 | 393 | 50 | 50  | 3.93E-05 | 0.275 |
| Iridium   | 3 | 5.0  | Carbon  | methanol | 100 | 100 | 100 | 6957 | 393 | 50 | 45  | 3.93E-05 | 0.275 |
| Palladium | 1 | 5.0  | Carbon  | methanol | 100 | 98  | 98  | 4591 | 393 | 50 | 30  | 5.87E-05 | 0.275 |
| Palladium | 2 | 2.0  | Carbon  | methanol | 100 | 99  | 99  | 2322 | 393 | 50 | 60  | 1.17E-04 | 0.275 |
| Palladium | 2 | 2.0  | Carbon  | methanol | 100 | 98  | 98  | 2308 | 393 | 50 | 40  | 1.17E-04 | 0.275 |
| Nickel    | 1 | 20.0 | Zeolite | methanol | 100 | 85  | 85  | 21   | 348 | 26 | 120 | 1.70E-03 | 0.041 |
| Nickel    | 1 | 10.0 | Zeolite | methanol | 100 | 78  | 78  | 19   | 348 | 26 | 120 | 1.70E-03 | 0.041 |
| Palladium | 1 | 5.1  | TMO     | methanol | 100 | 99  | 100 | 158  | 333 | 20 | 120 | 4.75E-05 | 0.008 |
| Palladium | 1 | 5.3  | TMO     | methanol | 99  | 66  | 66  | 100  | 333 | 20 | 240 | 4.93E-05 | 0.008 |
| Palladium | 1 | 4.0  | TMO     | methanol | 100 | 100 | 100 | 201  | 333 | 20 | 120 | 3.72E-05 | 0.008 |
| Palladium | 1 | 4.3  | Carbon  | methanol | 100 |     |     |      | 373 | 14 | 14  | 4.28E-05 | 0.100 |
| Palladium | 1 | 3.8  | Carbon  | methanol | 100 |     |     |      | 373 | 14 | 10  | 4.28E-05 | 0.100 |
| Palladium | 1 | 4.3  | Carbon  | methanol | 100 |     |     |      | 373 | 14 | 9   | 4.28E-05 | 0.100 |
| Palladium | 1 | 4.0  | Carbon  | methanol | 100 |     |     |      | 373 | 14 | 16  | 4.28E-05 | 0.100 |
| Palladium | 1 | 4.4  | Carbon  | methanol | 100 |     |     |      | 373 | 14 | 12  | 4.28E-05 | 0.100 |
| Palladium | 1 | 4.4  | Carbon  | methanol | 100 |     |     |      | 373 | 14 | 9   | 4.28E-05 | 0.100 |
| Palladium | 1 | 4.7  | Carbon  | methanol | 100 |     |     |      | 373 | 14 | 6   | 4.28E-05 | 0.100 |
| Palladium | 1 | 4.5  | Carbon  | methanol | 100 |     |     |      | 373 | 14 | 7   | 4.28E-05 | 0.100 |
| Nickel    | 1 | 39.7 | Zeolite | ethanol  | 100 | 99  | 99  | 8    | 363 | 22 | 75  | 3.38E-03 | 0.027 |
| Palladium | 2 |      | Polymer | ethanol  | 78  |     |     |      | 338 | 1  | 120 | 4.00E-06 | 0.002 |
| Palladium | 2 |      | Polymer | ethanol  | 99  | 99  | 100 | 1000 | 338 | 1  | 37  | 4.00E-06 | 0.004 |
| Nickel    | 3 | 68.6 | None    |          | 95  |     | 100 |      | 383 | 20 | 120 | 5.84E-03 | 0.027 |
| Nickel    | 3 | 67.9 | None    |          | 98  |     | 100 |      | 383 | 20 | 110 | 5.78E-03 | 0.027 |
| Nickel    | 3 | 67.4 | None    |          | 100 |     | 100 |      | 383 | 20 | 100 | 5.74E-03 | 0.027 |
| Nickel    | 3 | 63.4 | None    |          | 100 |     | 100 |      | 383 | 20 | 60  | 5.40E-03 | 0.027 |
| Nickel    | 3 | 58.9 | None    |          | 100 |     | 100 |      | 383 | 20 | 80  | 3.39E-02 | 0.027 |

TMO - transition metal oxide, PTMO - post transition metal oxide

## S2. Results of Spearman correlation analysis with full data set Differences of the Unfiltered and filtered data set results

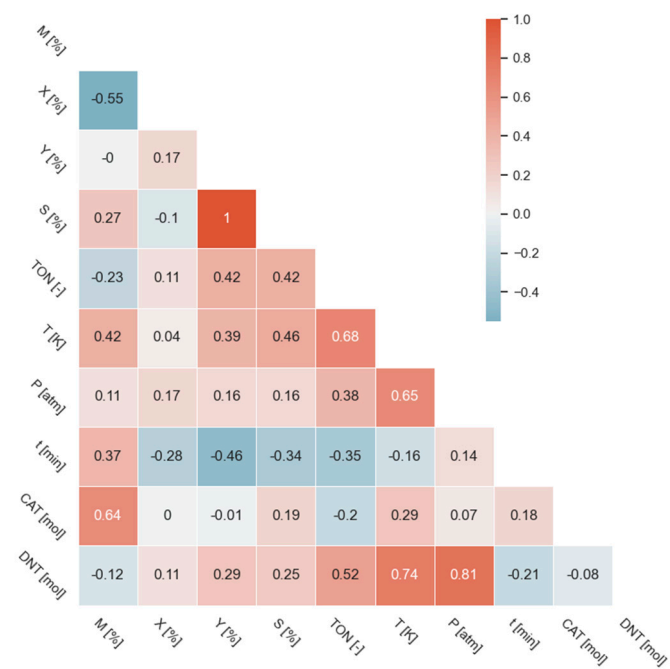

**S3. Results of Spearman correlation analysis – differences of the unfiltered and filtered data set results**
